# Supplementary material
Source: publisher site journal article supplement (https://www.dovepress.com/get_supplementary_file.php?f=377767.docx)
Supplement: Supplementary file 1 [file get_supplementary_file.php]

**Figure S1** The incidence of PC-AKI in the three groups.

**
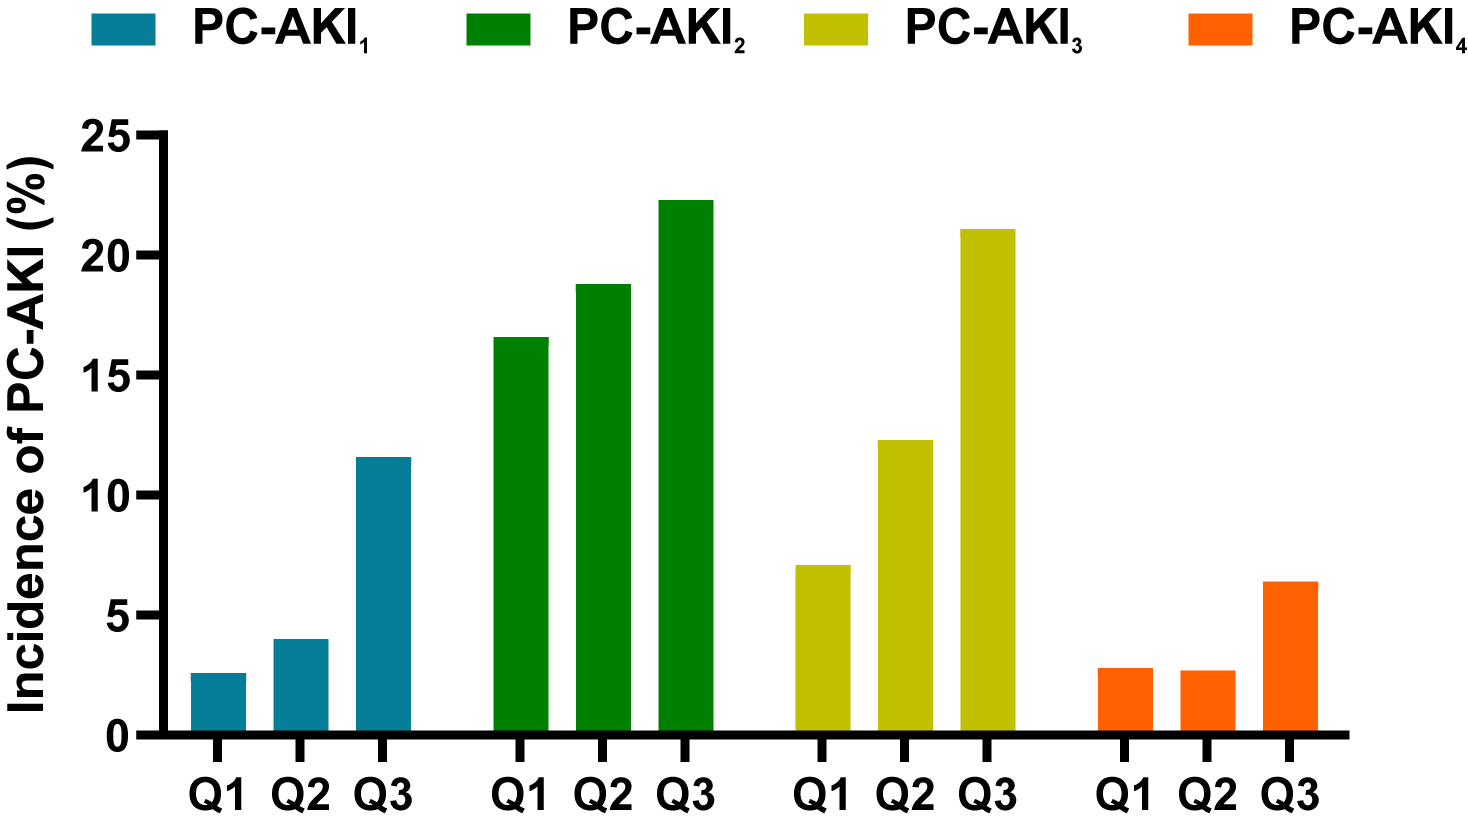
**

**Figure S2** The incidence of in-hospital MACEs in the three groups.

**
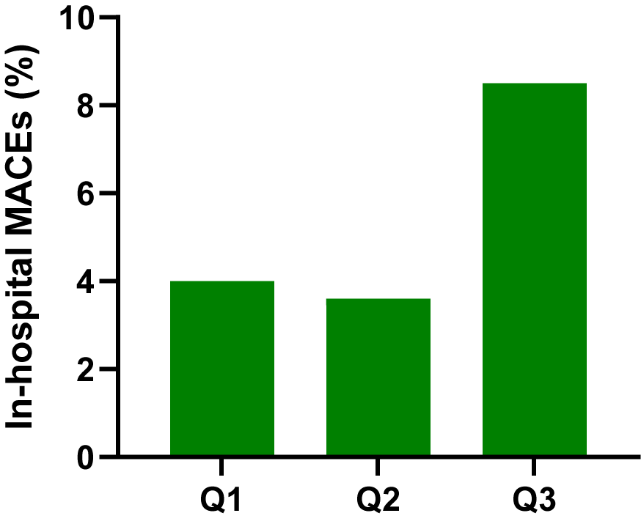
**

**Table S1** Univariate logistic regression analysis for the sUAR as continuous variable.

| **Variables** | **PC-AKI** | | |  | **In-hospital MACEs** | | |
| --- | --- | --- | --- | --- | --- | --- | --- |
| **OR** | **95% CI** | ***P* value** | **OR** | **95% CI** | ***P* value** |
| sUAR, per 1-unit increase | 1.17 | 1.13~1.20 | <.001 | 1.12 | 1.08~1.16 | <.001 |
| Age | 1.06 | 1.04~1.07 | <.001 | 1.04 | 1.03~1.06 | <.001 |
| Female | 1.16 | 0.79~1.71 | 0.452 | 1.61 | 1.10~2.36 | 0.014 |
| Killip classification | 3.70 | 2.70~5.06 | <.001 | 4.18 | 2.98~5.86 | <.001 |
| Anemia | 2.03 | 1.49~2.77 | <.001 | 1.55 | 1.11~2.16 | 0.010 |
| Current smoking | 0.59 | 0.42~0.82 | 0.002 | 0.72 | 0.51~1.02 | 0.062 |
| Diabetes | 2.09 | 1.54~2.85 | <.001 | 1.41 | 1.00~1.98 | 0.047 |
| Hypertension | 1.78 | 1.29~2.45 | <.001 | 1.35 | 0.97~1.87 | 0.078 |
| COPD | 1.80 | 0.81~4.01 | 0.147 | 2.43 | 1.14~5.19 | 0.021 |
| eGFR | 0.97 | 0.96~0.98 | <.001 | 0.98 | 0.97~0.98 | <.001 |
| Previous MI | 0.53 | 0.34~0.81 | 0.004 | 0.65 | 0.42~1.00 | 0.051 |
| Prior PCI | 0.98 | 0.62~1.54 | 0.925 | 0.85 | 0.51~1.41 | 0.529 |
| Prior stroke | 3.61 | 2.42~5.40 | <.001 | 2.81 | 1.79~4.39 | <.001 |
| Aspirin | 0.66 | 0.23~1.86 | 0.430 | 0.44 | 0.17~1.14 | 0.091 |
| GP IIb/IIIa inhibitor | 1.07 | 0.78~1.47 | 0.670 | 1.58 | 1.14~2.19 | 0.006 |
| Multi-vessel stenosis | 1.15 | 0.83~1.60 | 0.395 | 1.67 | 1.15~2.42 | 0.007 |
| PCI access | 2.60 | 1.84~3.67 | <.001 | 3.71 | 2.63~5.26 | <.001 |

COPD: chronic obstructive pulmonary disease; eGFR: estimated glomerular filtration rate; MI: myocardial infarction; PCI: percutaneous coronary intervention.

**Table S2** Univariate logistic regression analysis for the sUAR as categorical variable.

| **Variables** | **PC-AKI** | | |  | **In-hospital MACEs** | | |
| --- | --- | --- | --- | --- | --- | --- | --- |
| **OR** | **95% CI** | ***P* value** | **OR** | **95% CI** | ***P* value** |
| Q1 | Reference | | | Reference | | |
| Q2 | 1.54 | 0.92~2.57 | 0.099 | 0.89 | 0.56~1.43 | 0.628 |
| Q3 | 4.89 | 3.14~7.62 | <.001 | 2.23 | 1.50~3.32 | <.001 |
| Age | 1.06 | 1.04~1.07 | <.001 | 1.04 | 1.03~1.06 | <.001 |
| Female | 1.16 | 0.79~1.71 | 0.452 | 1.61 | 1.10~2.36 | 0.014 |
| Killip classification | 3.70 | 2.70~5.06 | <.001 | 4.18 | 2.98~5.86 | <.001 |
| Anemia | 2.03 | 1.49~2.77 | <.001 | 1.55 | 1.11~2.16 | 0.010 |
| Current smoking | 0.59 | 0.42~0.82 | 0.002 | 0.72 | 0.51~1.02 | 0.062 |
| Diabetes | 2.09 | 1.54~2.85 | <.001 | 1.41 | 1.00~1.98 | 0.047 |
| Hypertension | 1.78 | 1.29~2.45 | <.001 | 1.35 | 0.97~1.87 | 0.078 |
| COPD | 1.80 | 0.81~4.01 | 0.147 | 2.43 | 1.14~5.19 | 0.021 |
| eGFR | 0.97 | 0.96~0.98 | <.001 | 0.98 | 0.97~0.98 | <.001 |
| Previous MI | 0.53 | 0.34~0.81 | 0.004 | 0.65 | 0.42~1.00 | 0.051 |
| Prior PCI | 0.98 | 0.62~1.54 | 0.925 | 0.85 | 0.51~1.41 | 0.529 |
| Prior stroke | 3.61 | 2.42~5.40 | <.001 | 2.81 | 1.79~4.39 | <.001 |
| Aspirin | 0.66 | 0.23~1.86 | 0.430 | 0.44 | 0.17~1.14 | 0.091 |
| GP IIb/IIIa inhibitor | 1.07 | 0.78~1.47 | 0.670 | 1.58 | 1.14~2.19 | 0.006 |
| Multi-vessel stenosis | 1.15 | 0.83~1.60 | 0.395 | 1.67 | 1.15~2.42 | 0.007 |
| PCI access | 2.60 | 1.84~3.67 | <.001 | 3.71 | 2.63~5.26 | <.001 |

COPD: chronic obstructive pulmonary disease; eGFR: estimated glomerular filtration rate; MI: myocardial infarction; PCI: percutaneous coronary intervention.

**Table S3** The AUC of the sUAR for predicting the PC-AKI in the context of other definitions of PC-AKI

|  | **AUC (95% CI)** |
| --- | --- |
| PC-AKI2 | 0.548 (95%CI 0.520-0.575) |
| PC-AKI3 | 0.655 (95%CI 0.625-0.686) |
| PC-AKI4 | 0.622 (95%CI 0.563-0.681) |

**Table S4** The AUC of the sUAR for predicting the PC-AKI stratified by eGFR, age, gender, contrast volume, diabetes mellitus, hypertension, and anemia.

| **Subgroups** | **AUC (95% CI)** |
| --- | --- |
| **eGFR (mL/min)** |  |
| eGFR=60 | 0.603 (95%CI 0.541-0.665) |
| eGFR>60 | 0.616 (95%CI 0.547-0.686) |
| **Age (years)** |  |
| Age<65 | 0.727 (95%CI 0.651-0.804) |
| Age≥65 | 0.671 (95%CI 0.617-0.725) |
| **Gender** |  |
| Male | 0.697 (95%CI 0.649-0.746) |
| Female | 0.748 (95%CI 0.659-0.837) |
| **Contrast medium (mL)** |  |
| Contrast volume>100 | 0.719 (95%CI 0.673-0.765) |
| Contrast volume<100 | 0.670 (95%CI 0.563-0.776) |
| **Diabetes mellitus** |  |
| Yes | 0.712 (95%CI 0.650-0.774) |
| No | 0.698 (95%CI 0.640 -0.756) |
| **Hypertension** |  |
| Yes | 0.687 (95%CI 0.635-0.738) |
| No | 0.715 (95%CI 0.635-0.794) |
| **Anemia** |  |
| Yes | 0.703 (95%CI 0.643-0.763) |
| No | 0.688 (95%CI 0.626-0.750) |
